# Supplementary material for: Deep learning the collisional cross sections of the peptide universe from a million experimental values
Source: Springer Nature journal article supplement (doi:10.1038/s41467-021-21352-8), 2021-02-19
Supplement: 41467_2021_21352_MOESM1_ESM.pdf [file 41467_2021_21352_MOESM1_ESM.pdf]

## Supplementary Information

# Deep learning the collisional cross sections of the peptide universe from a million experimental values

Florian Meier<sup>1,#,\$</sup>, Niklas D. Köhler<sup>2,#</sup>, Andreas-David Brunner<sup>1,#</sup>, Jean-Marc H. Wanka<sup>2</sup>, Eugenia Voytik<sup>1</sup>, Maximilian T. Strauss<sup>1</sup>, Fabian J. Theis<sup>2,3\*</sup> and Matthias Mann<sup>1,4,\*</sup>

<sup>1</sup> Department Proteomics and Signal Transduction, Max Planck Institute of Biochemistry, Martinsried, Germany

<sup>2</sup> Institute of Computational Biology, Helmholtz Zentrum München - German Research Center for Environmental Health, Neuherberg, Germany

<sup>3</sup> Department of Mathematics, TU München, Munich, Germany

<sup>4</sup> NNF Center for Protein Research, Faculty of Health Sciences, University of Copenhagen, Copenhagen, Denmark

# These authors contributed equally.

\$ Present address: Functional Proteomics, Jena University Hospital, Jena, Germany

\* Correspondence and material requests may be addressed to F.J.T. (fabian.theis@helmholtz-muenchen.de) or M.M. (mman@biochem.mpg.de).

**Supplementary Table 1.** Details on experimental parameters used in this study. Layout according to ref. 1.

|    | <b>Parameter</b>                | <b>Part of or influences the definition of the measurand (IS = ion structure, gas, <math>T</math> and/or <math>E/N</math>)</b> | <b>Values</b>                                                                                                                                                                                                                                                                                                                                                                                              |
|----|---------------------------------|--------------------------------------------------------------------------------------------------------------------------------|------------------------------------------------------------------------------------------------------------------------------------------------------------------------------------------------------------------------------------------------------------------------------------------------------------------------------------------------------------------------------------------------------------|
| 1  | Analyte                         | IS                                                                                                                             | Enzymatic digest of protein extracts from biological sources and pooled synthetic peptides.                                                                                                                                                                                                                                                                                                                |
| 2  | Solvent of LC effluent          | May influence IS                                                                                                               | Buffer A: 100% water + 0.1% formic acid<br>Buffer B: 80/20% ACN/water (v/v) + 0.1% formic acid                                                                                                                                                                                                                                                                                                             |
| 3  | Ionization method               | May influence IS                                                                                                               | Nano electrospray (Bruker CaptiveSpray)                                                                                                                                                                                                                                                                                                                                                                    |
| 4  | Ionization polarity             | Influences IS                                                                                                                  | Positive                                                                                                                                                                                                                                                                                                                                                                                                   |
| 5  | Adduct ID                       | Influences IS                                                                                                                  | $[M+2H]^{2+}$ , $[M+3H]^{3+}$ , $[M+4H]^{4+}$ , <i>cf.</i> Figure 1 and MaxQuant result tables (evidence.txt)                                                                                                                                                                                                                                                                                              |
| 6  | Pre-IM ion transfer conditions  | May influence IS                                                                                                               | Instrument: Bruker timsTOF Pro with dual TIMS.<br>See ref. 2 for details on the ion path. Full method details are included in each raw file.                                                                                                                                                                                                                                                               |
| 7  | Post-IM ion transfer conditions | No, but critical for peak assignment of analytes that may fragment after IM.                                                   | We only considered full tryptic peptides.                                                                                                                                                                                                                                                                                                                                                                  |
| 8  | Method of measurement           | No (see ref. 1)                                                                                                                | TIMS $1/K_0$ values were calibrated linearly using three ions from the Agilent ESI LC/MS tuning mix ( $m/z$ , $1/K_0$ : 622.0289, 0.9848 Vs cm <sup>-2</sup> ; 922.0097, 1.1895 Vs cm <sup>-2</sup> ; 1221.9906, 1.3820 Vs cm <sup>-2</sup> )<br><br>CCS values were calculated from $1/K_0$ values using the Mason Schamp equation and assuming $T = 305$ K and $N_2$ as collision partner ( $m = 28$ Da) |
| 9  | IM gas nature (incl. purity)    | gas                                                                                                                            | $N_2$ (ambient air)                                                                                                                                                                                                                                                                                                                                                                                        |
| 10 | IM gas temperature              | $T$ and influences IS                                                                                                          | Not controlled ( $T \sim 305$ K)                                                                                                                                                                                                                                                                                                                                                                           |
| 11 | IM gas pressure                 | Influences $E/N$                                                                                                               | Pressure at tunnel entrance $\sim 2.7$ mbar.                                                                                                                                                                                                                                                                                                                                                               |
| 12 | Electric field                  | Influences $E/N$                                                                                                               | Linear scan range: 1.51 Vs cm <sup>-2</sup> to 0.6 Vs cm <sup>-2</sup><br>Ramp time: 100 ms<br>Voltage difference: 130 V                                                                                                                                                                                                                                                                                   |

|    |                           |                  |                                                                                                                                                                                              |
|----|---------------------------|------------------|----------------------------------------------------------------------------------------------------------------------------------------------------------------------------------------------|
| 13 | Length of drift tube      | Influences E/N   | Not applicable                                                                                                                                                                               |
| 14 | <i>E/N</i>                | <i>E/N</i>       | Not determined, see for example ref. 1                                                                                                                                                       |
| 15 | IM separation time        | May influence IS | 100 ms                                                                                                                                                                                       |
| 16 | Calibrant or QC compounds | No (see ref. 1)  | Low concentration Agilent ESI LC/MS tuning mix<br><i>m/z</i> , $1/K_0$ : 622.0289, 0.9848 Vs cm <sup>-2</sup> ; 922.0097, 1.1895 Vs cm <sup>-2</sup> ; 1221.9906, 1.3820 Vs cm <sup>-2</sup> |

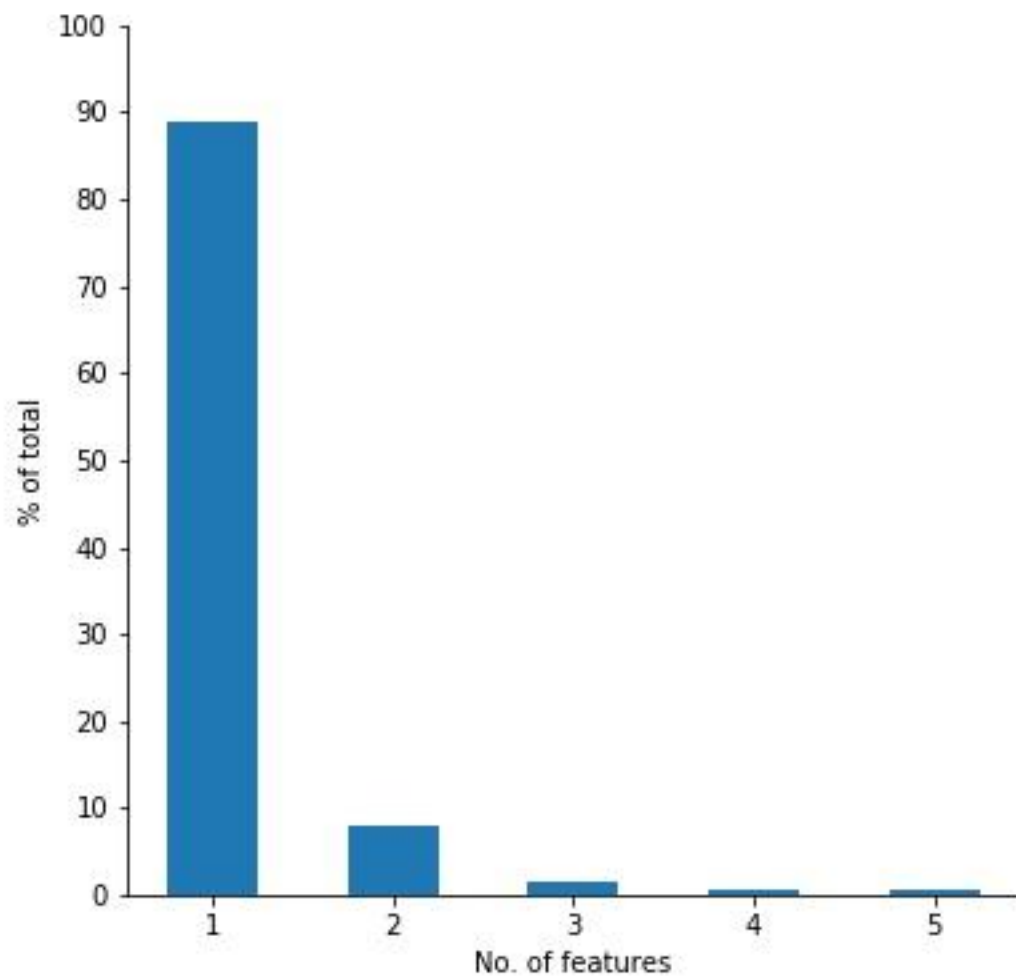

**Supplementary Figure 1.** Number of detected features per modified peptide sequence and charge state in single LC-TIMS-MS experiments (n = 2,029,123).

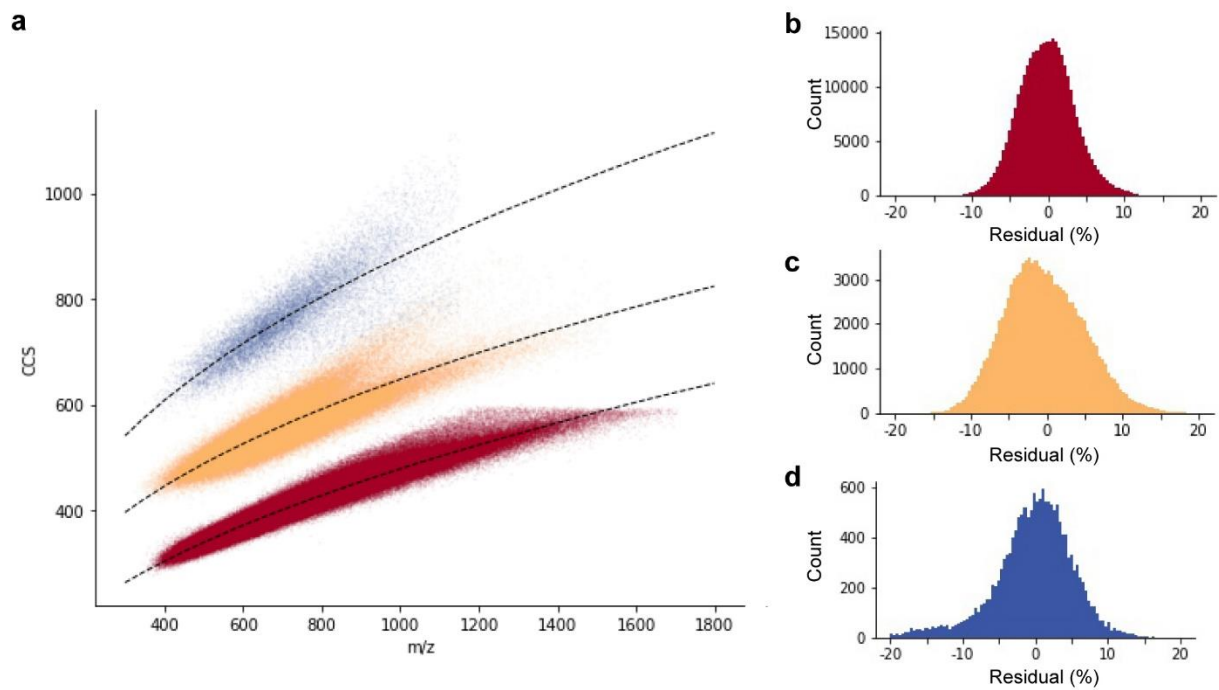

**Supplementary Figure 2.** **a**, Distribution of tryptic peptides in the  $m/z$  vs. CCS space color-coded by charge state as in Figure 1. Fitted power-law ( $A \cdot x^b$ ) trend lines (dashed lines) visualize the correlation of ion mass and mobility in each charge state. **b-d**, Residuals (calculated as  $(CCS_{\text{exp}} - CCS_{\text{trendline}})/CCS_{\text{trendline}}$ ) for charge states 2, 3 and 4.

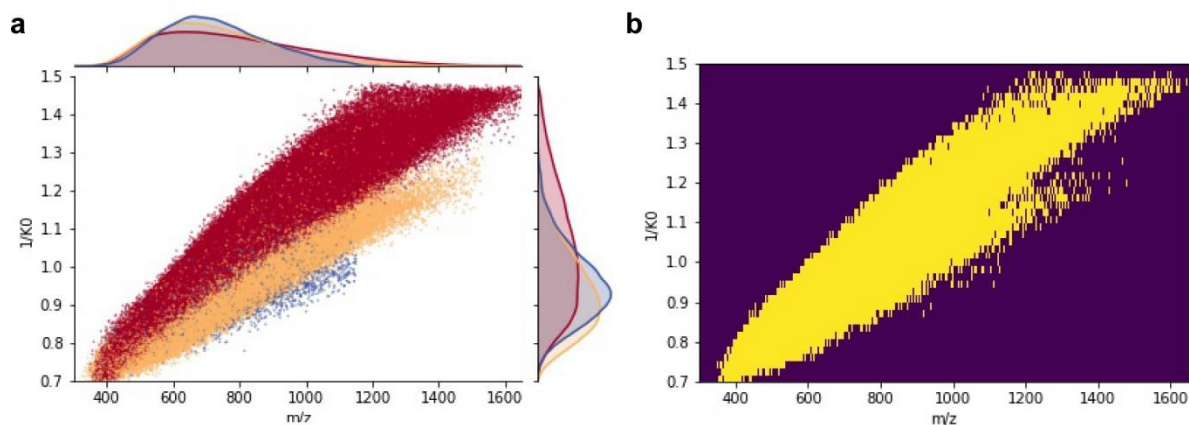

**Supplementary Figure 3. a**, Distribution of tryptic peptides in the  $m/z$  vs. ion mobility ( $1/K_0$ ) space color-coded by charge state as in Figure 1. **b**, Estimating the peak capacity ( $\Phi$ ) of two-dimensional peptide separation with TIMS-MS. In an ideally orthogonal 2D separation, the total peak capacity would be  $\Phi_{MS} * \Phi_{TIMS}$ . Assuming an ion mobility resolution of 60 ( $(1/K_0) / \Delta(1/K_0)$ ), the average peak full width at half maximum is 0.018 Vs  $cm^{-2}$  in the peptide  $1/K_0$  range (0.7-1.5 Vs  $cm^{-2}$ ). This would result in a theoretical peak capacity of  $\Phi_{MS} * 44$ . However, the correlation of mass and mobility reduces the effective peak capacity and the 2D histogram analysis (1350  $m/z$  x 44 ion mobility bins) shows that 96% of the peptides occupy about 27% of the total area (yellow vs. purple area). Using this as a correction factor, we estimate the peak capacity of TIMS-MS to about  $\Phi_{MS} * 12$ .

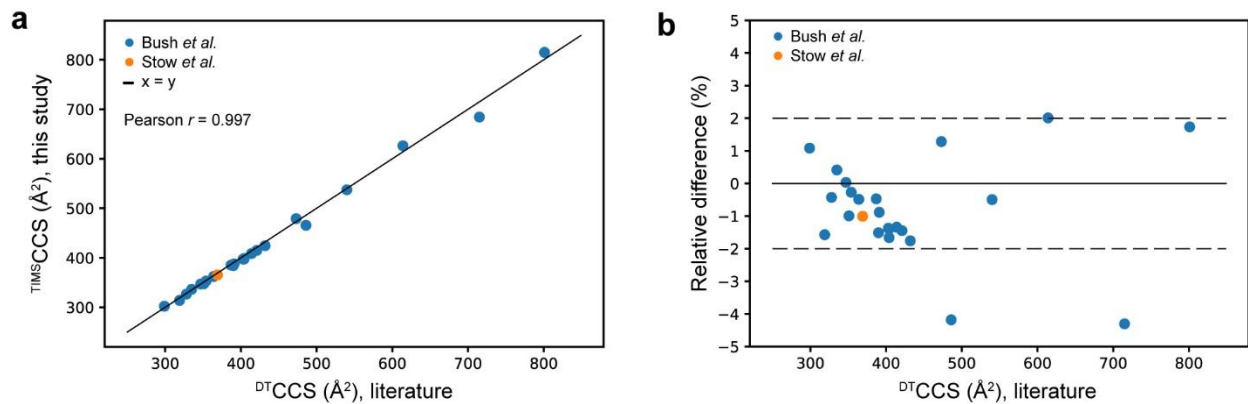

**Supplementary Figure 4. Accuracy of peptide  ${}^{\text{TIMS}}\text{CCS}$  values.** **a**, Correlation of  ${}^{\text{TIMS}}\text{CCS}$  values in this study with ion-nitrogen cross sections measured with gold-standard drift tube instruments (Bush *et al.*,  $n = 23$ , Stow *et al.*,  $n = 1$ ). **b**, Relative deviation  $({}^{\text{TIMS}}\text{CCS} - {}^{\text{DT}}\text{CCS}) / {}^{\text{DT}}\text{CCS}$  of all data points in a. The mean deviation was  $-0.80\%$  and the mean absolute deviation was  $1.35\%$ . Solid and dashed lines indicate  $0$  and  $\pm 2\%$  relative deviation, respectively.

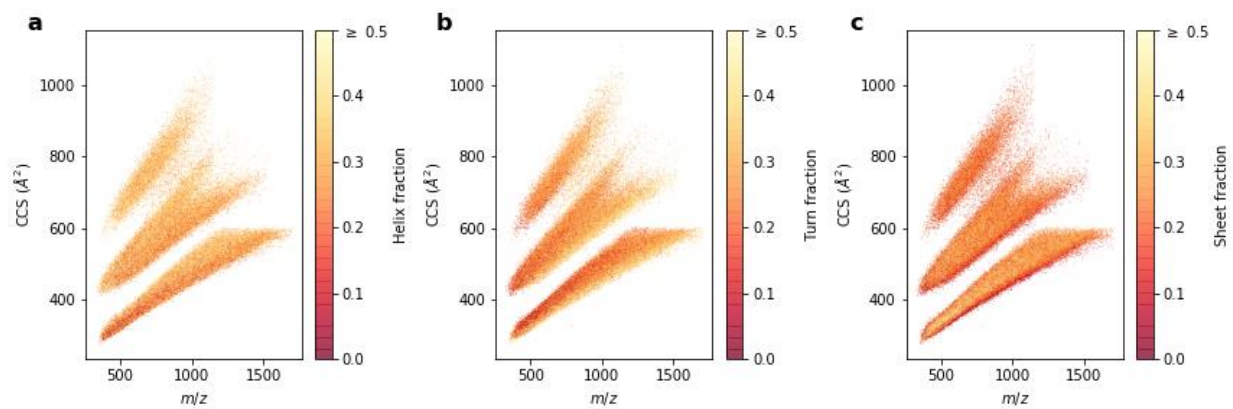

**Supplementary Figure 5.** Fraction of amino acids favoring **a**, helical (A, L, M, H, Q, E), **b**, turn (V, I, F, T, Y) and **c**, sheet (G, S, D, N, P) secondary peptide structures according to ref. 45.



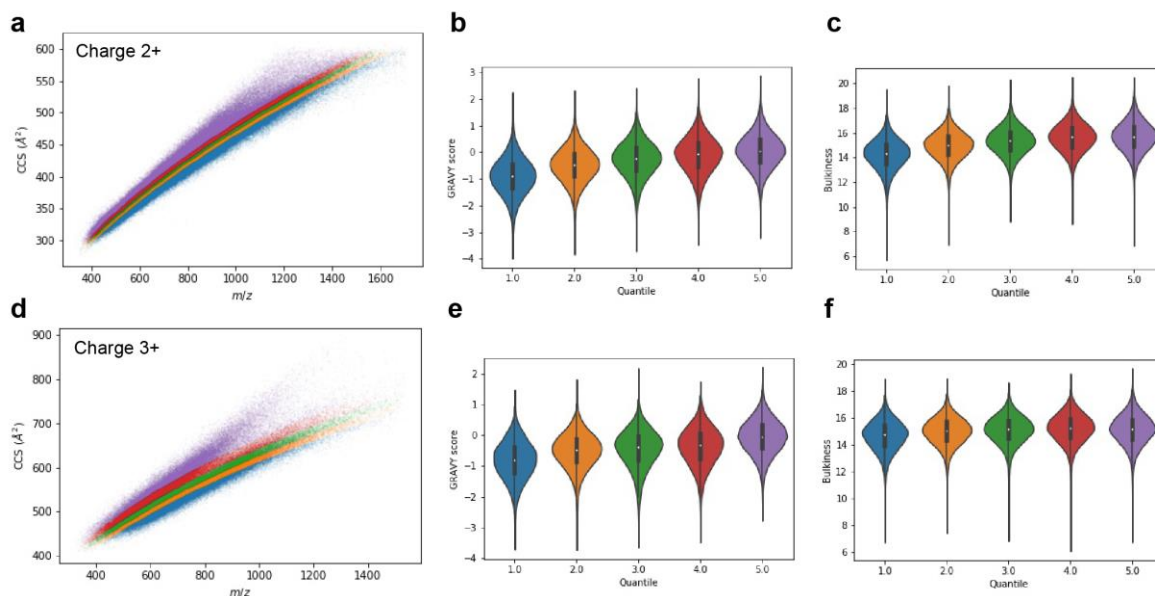

**Supplementary Figure 6.** Global correlations of peptide CCS values and physicochemical properties. **a**, Mass-to-charge vs. collisional cross section distribution of doubly charged peptides color-coded in quantiles by the relative deviation from the trend line ( $n = 391,732$ ). **b**, Violin plots of the GRAVY scores in each quantile ( $n = 143,850$ ). **c**, Violin plots of the average amino acid bulkiness in each quantile. **d-f**, Same as **a-c** but for triply charged peptides. Data are presented as violin plots showing kernel density estimates and boxplots with the following elements: median (center), 25<sup>th</sup> and 75<sup>th</sup> percentiles (lower and upper box limits), the 1.5x interquartile range (whiskers).

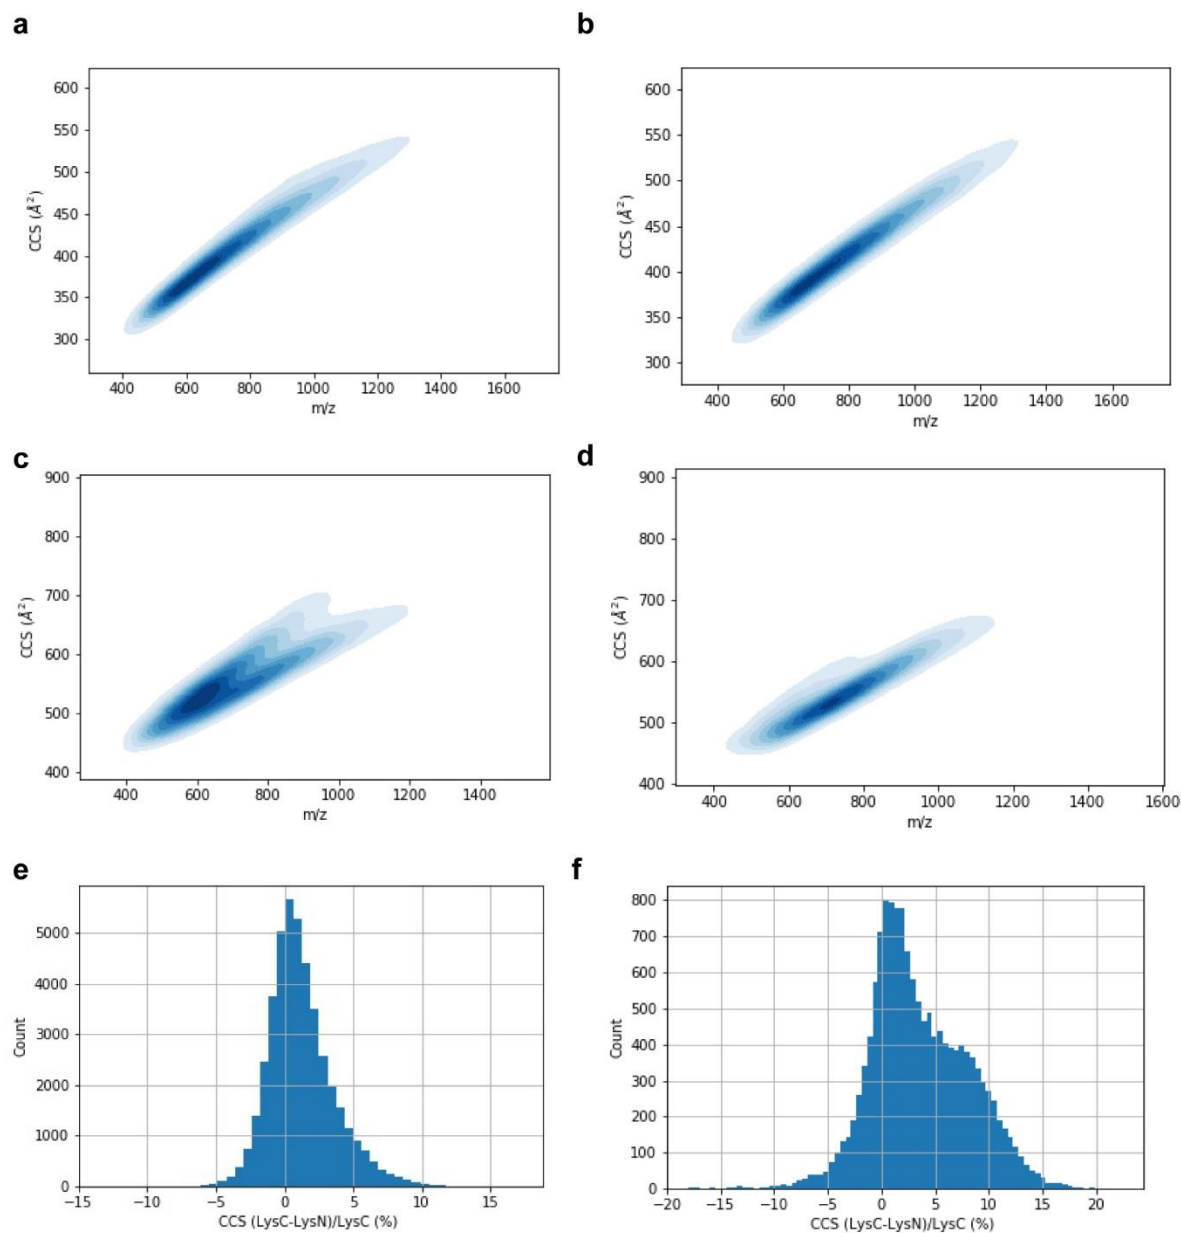

**Supplementary Figure 7.** CCS comparison of LysC and LysN digests. **a,b**, Density distribution of doubly charged peptides with **a**, C-terminal lysine and **b**, N-terminal lysine. **c,d**, Density distribution of triply charged peptides with **a**, C-terminal lysine and **b**, N-terminal lysine. **e**, Pairwise comparison of doubly-charged peptides with the same internal sequence. **f**, Pairwise comparison of triply-charged peptides with the same internal sequence.

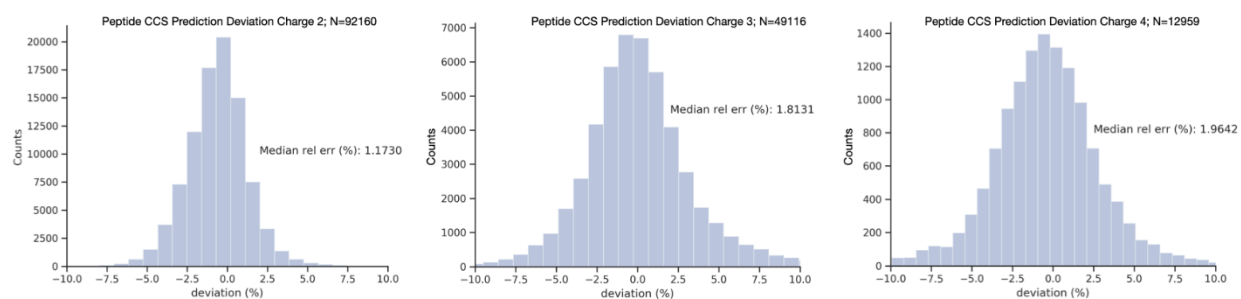

**Supplementary Figure 8.** Relative deviation of predicted CCS values from an experimental validation dataset of synthetic peptides from the ProteomeTools project by charge state (n = 92,160 charge 2 peptides; n = 49,116 charge 3 peptides; n = 12,959 charge 4 peptides).

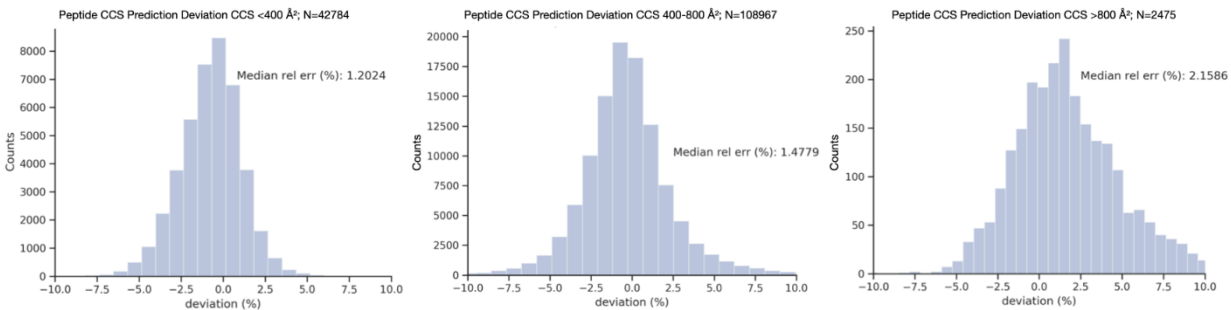

**Supplementary Figure 9.** Relative deviation of predicted CCS values from an experimental validation dataset of synthetic peptides from the ProteomeTools project by CCS value (n = 42,784 peptides; n = 108,967 peptides; n = 2,475 peptides).

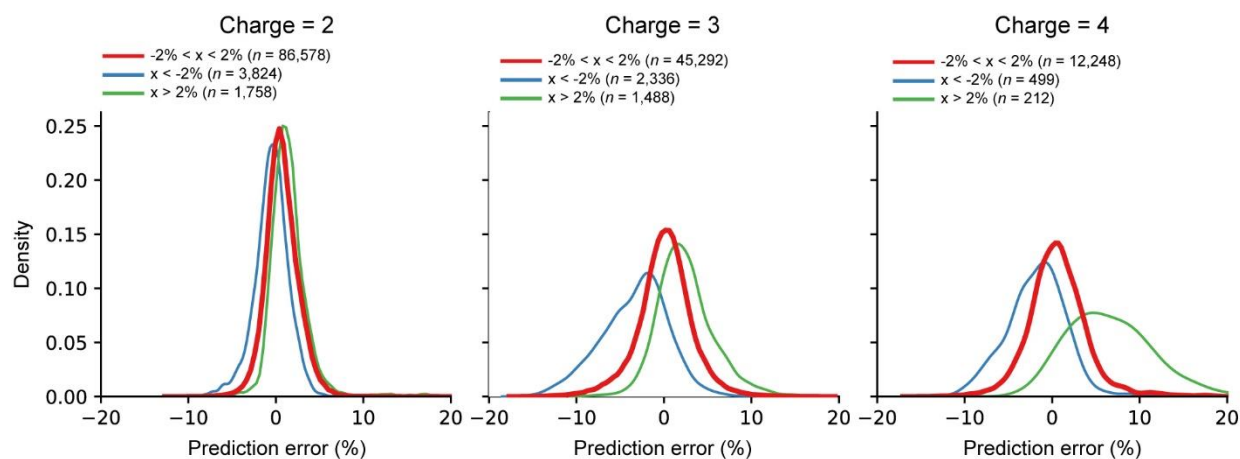

**Supplementary Figure 10.** CCS value prediction accuracy by charge state for peptide sequences detected with multiple features in LC-TIMS-MS experiments of synthetic ProteomeTools peptides.  $x$  is the relative distance of the most distant secondary feature to the most abundant feature in the CCS dimension within one LC-TIMS-MS experiment. 78 values are outside the displayed x-axis range.

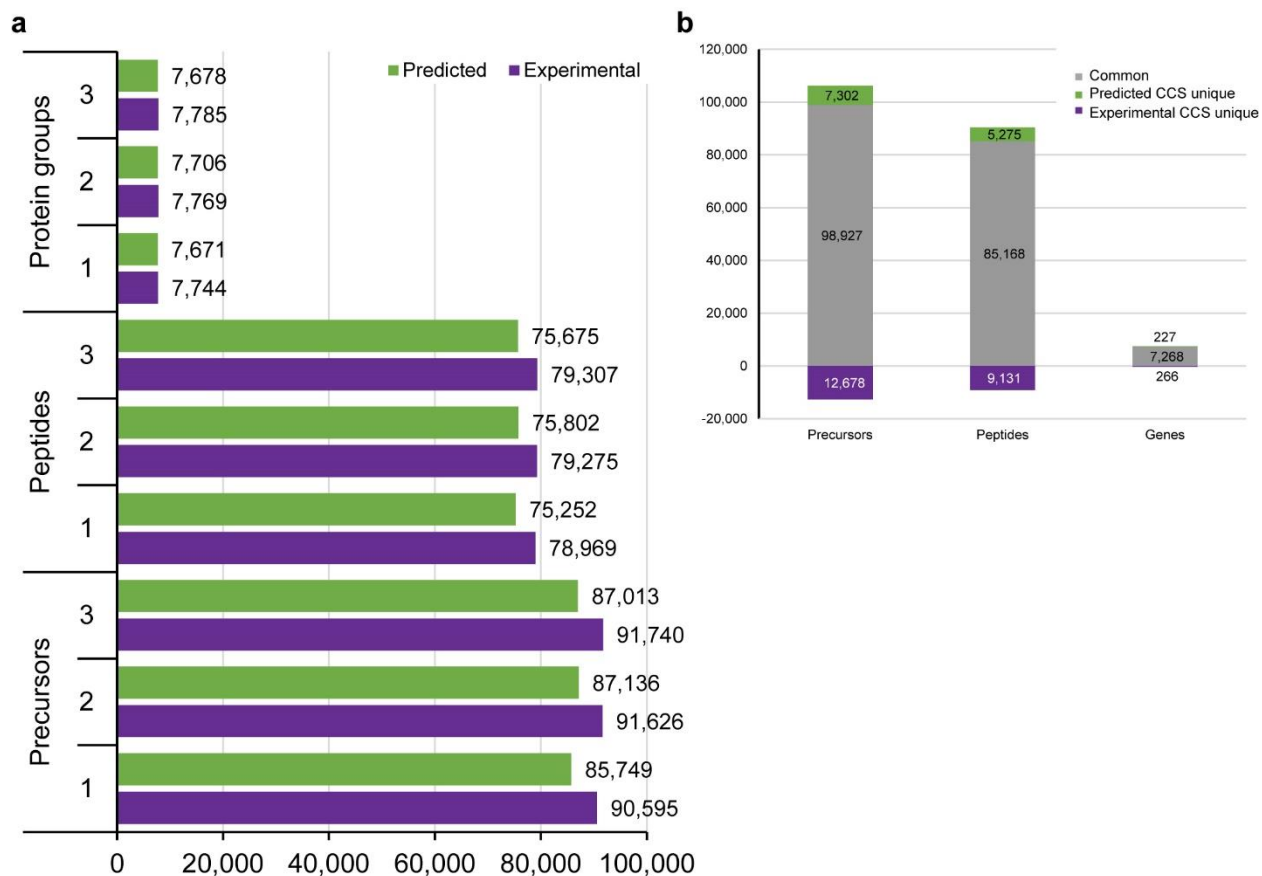

**Supplementary Figure 11. Application of predicted CCS values to diaPASEF.** **a**, Number of identified precursors, peptides and protein groups in three replicate injections of 200 ng HeLa digest using either a project-specific library with experimental ion mobility values or predicted ion mobility values. **b**, Overlap and unique identifications in the overall data set with either library.

## Supplementary References

- Gabelica, V. et al. Recommendations for reporting ion mobility Mass Spectrometry measurements. *Mass Spectrom. Rev.* **38**, 291–320 (2019).
- Meier, F. et al. Online Parallel Accumulation–Serial Fragmentation (PASEF) with a Novel Trapped Ion Mobility Mass Spectrometer. *Mol. Cell. Proteomics* **17**, 2534–2545 (2018).
